# Supplementary material for: ECG-Based Semi-Supervised Anomaly Detection for Early Detection and Monitoring of Epileptic Seizures
Source: MDPI journal article supplement (doi:10.3390/ijerph20065000), 2023-03-12
Supplement: s1 [file s1]

# Supplementary Material:

## S1. Model performance per patient

In Table S1. of our supplementary material we present the performance of the three studied anomaly detection methods, LOF, MCD and OCSVM on each seizure case contained in the PIHROPE dataset.

**Table S1.** A per case breakdown of model performance

| Model   | Case               | <u>Threshold</u> | $\Delta T_W^2$ | AUC (%)    | Accuracy (%) | Sensitivity (%) | Specificity (%) |
|---------|--------------------|------------------|----------------|------------|--------------|-----------------|-----------------|
| LOF     | sz01-1             | -2.66/-1.99      | 06:28/06:28    | 100.0/95.4 | 100.0/93.4   | 100.0/90.6      | 100.0/99.6      |
|         | sz02-1             | -1.65/-2.53      | 29:02/28:26    | 99.7/99.2  | 96.5/94.7    | 94.7/94.3       | 100.0/95.2      |
|         | sz02-2             | -1.51/-1.73      | 20:46/20:36    | 99.9/92.2  | 99.5/91.9    | 98.9/100.0      | 100.0/87.1      |
|         | sz03-1             | -1.43/-1.46      | 21:16/21:16    | 94.3/96.8  | 90.4/91.2    | 84.2/89.2       | 94.5/92.2       |
|         | sz03-2             | -1.47/-4.45      | 07:13/07:13    | 98.0/99.9  | 93.9/99.5    | 89.7/100.0      | 94.6/99.4       |
|         | sz04-1             | -1.61/-1.78      | 05:58/05:58    | 96.4/99.9  | 88.8/97.9    | 97.3/99.5       | 83.2/96.6       |
|         | sz05-1             | -1.18/-2.43      | 13:20/13:20    | 68.6/100.0 | 55.8/100.0   | 33.7/100.0      | 98.6/100.0      |
|         | sz06-1             | -1.09/-1.03      | 06:58/06:58    | 90.5/88.8  | 86.8/73.9    | 76.2/86.7       | 91.8/69.3       |
|         | sz06-2             | -1.37/-3.99      | 06:28/06:28    | 97.8/100.0 | 97.4/99.9    | 95.8/100.0      | 98.1/99.9       |
|         | sz07-1             | -3.18/-3.81      | 22:58/22:53    | 100.0/99.7 | 100.0/99.4   | 100.0/100.0     | 99.9/98.9       |
| AVG±STD | <i>Hand-picked</i> | -1.77±0.64       | 14:07±8:40     | 97.4±3.1   | 94.8±4.8     | 93.0±7.7        | 95.8±5.3        |
|         | <i>Weak</i>        | -2.53±1.17       | 14:01±8:32     | 96.9±3.8   | 93.5±7.7     | 95.6±5.2        | 93.1±9.3        |
| MCD     | sz01-1             | -2.50/-2.50      | 06:17/06:17    | 99.6/97.8  | 97.9/91.2    | 96.8/87.4       | 99.7/100.0      |
|         | sz02-1             | -1.87/-1.96      | 28:52/26:28    | 97.0/96.9  | 86.2/90.6    | 78.8/86.2       | 99.9/95.5       |
|         | sz02-2             | -1.82/-1.92      | 20:59/20:59    | 97.6/91.3  | 91.0/85.1    | 98.8/95.3       | 84.2/78.9       |
|         | sz03-1             | -1.31/-1.31      | 21:31/21:31    | 88.2/87.6  | 79.3/77.0    | 83.6/85.6       | 76.4/72.4       |
|         | sz03-2             | -1.71/-1.80      | 07:13/07:13    | 95.1/99.7  | 95.9/98.6    | 72.4/100.0      | 99.6/98.5       |
|         | sz04-1             | -2.31/-2.35      | 05:58/05:58    | 84.3/95.4  | 82.1/91.4    | 91.1/93.7       | 76.1/89.5       |
|         | sz05-1             | -0.87/-2.32      | 13:29/13:20    | 62.9/99.1  | 72.3/97.4    | 85.4/100.0      | 46.9/97.1       |
|         | sz06-1             | -1.72/-1.84      | 06:58/06:58    | 75.3/70.8  | 67.7/71.3    | 85.6/69.8       | 59.2/71.8       |
|         | sz06-2             | -2.07/-2.76      | 06:28/06:28    | 99.1/99.4  | 97.7/97.1    | 95.5/99.4       | 98.6/96.8       |
|         | sz07-1             | -2.16/-2.44      | 22:58/22:30    | 87.1/87.5  | 83.5/83.5    | 99.2/89.9       | 69.6/78.1       |
| AVG±STD | <i>Hand-picked</i> | -2.07±0.54       | 14:06±8:41     | 91.6±7.9   | 86.9±9.4     | 88.2±8.3        | 85.7±14.7       |
|         | <i>Weak</i>        | -2.20±0.53       | 13:37±8:02     | 92.4±8.9   | 88.9±9.3     | 91.1±9.2        | 87.8±10.5       |
| OCSVM   | sz01-1             | 1.12/1.13        | 06:27/06:28    | 100.0/97.8 | 99.6/94.0    | 99.4/91.9       | 100.0/98.8      |
|         | sz02-1             | 1.93/1.85        | 28:54/28:41    | 98.3/98.3  | 95.1/95.2    | 92.5/99.9       | 100.0/89.9      |
|         | sz02-2             | 1.19/1.06        | 20:49/20:41    | 100.0/91.6 | 99.6/91.7    | 99.2/100.0      | 99.9/86.8       |
|         | sz03-1             | 2.07/2.00        | 21:21/21:17    | 96.0/98.7  | 91.0/95.2    | 91.2/90.8       | 90.8/97.5       |
|         | sz03-2             | 2.75/1.91        | 07:13/07:13    | 94.0/100.0 | 87.6/99.8    | 80.4/100.0      | 88.8/99.8       |
|         | sz04-1             | 1.50/1.35        | 05:58/05:58    | 96.7/99.9  | 90.0/98.5    | 100.0/100.0     | 83.3/97.2       |
|         | sz05-1             | 2.10/1.76        | 13:20/13:20    | 50.1/100.0 | 49.3/100.0   | 28.3/100.0      | 90.1/100.0      |
|         | sz06-1             | 1.83/1.67        | 06:58/06:44    | 81.7/74.4  | 79.2/86.6    | 77.6/49.2       | 79.9/99.9       |
|         | sz06-2             | 1.89/0.02        | 06:28/06:28    | 98.5/100.0 | 97.3/99.7    | 95.8/100.0      | 97.9/99.7       |

|         |                    |           |             |            |            |            |             |
|---------|--------------------|-----------|-------------|------------|------------|------------|-------------|
|         | sz07-1             | 2.36/2.20 | 22:40/22:35 | 99.9/100.0 | 99.4/100.0 | 98.6/100.0 | 100.0/100.0 |
| AVG±STD | <i>Hand-picked</i> | 1.85±0.50 | 14:05±8:38  | 96.1±5.5   | 93.2±6.5   | 92.7±7.9   | 93.4±7.5    |
|         | <i>Weak</i>        | 1.47±0.63 | 14:00±8:35  | 95.6±7.9   | 95.6±4.2   | 92.4±15.7  | 96.6±4.6    |

<sup>1</sup> Metrics format: Hand-picked label metrics / Weak label metrics. <sup>2</sup> Time format: Min: Sec
